# Supplementary figures and images for: Dimerization of FIR upon FUSE DNA binding suggests a mechanism of c-myc inhibition
Source: PubMed Central journal article supplement — EMBO J. 2007 Dec 6;27(1):277–89. doi: 10.1038/sj.emboj.7601936 (PMC2206118; doi:10.1038/sj.emboj.7601936), 2007-12-06

**A**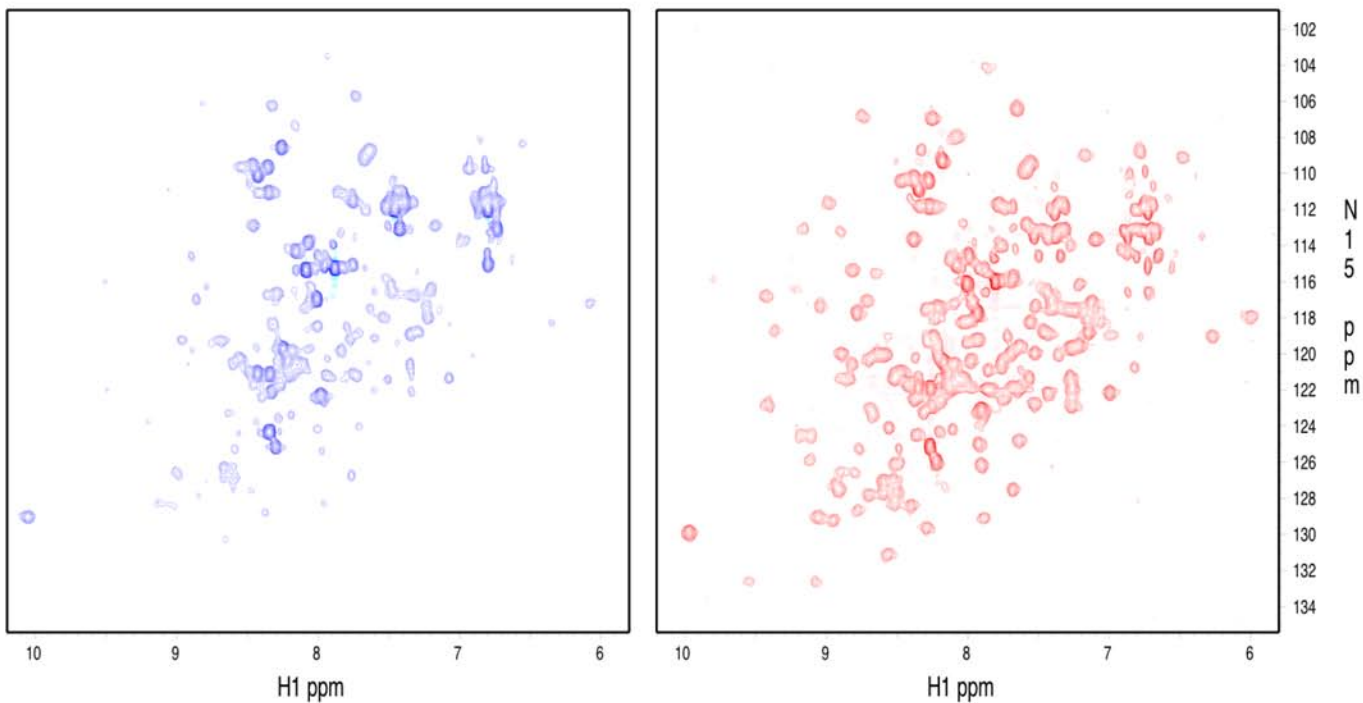**B**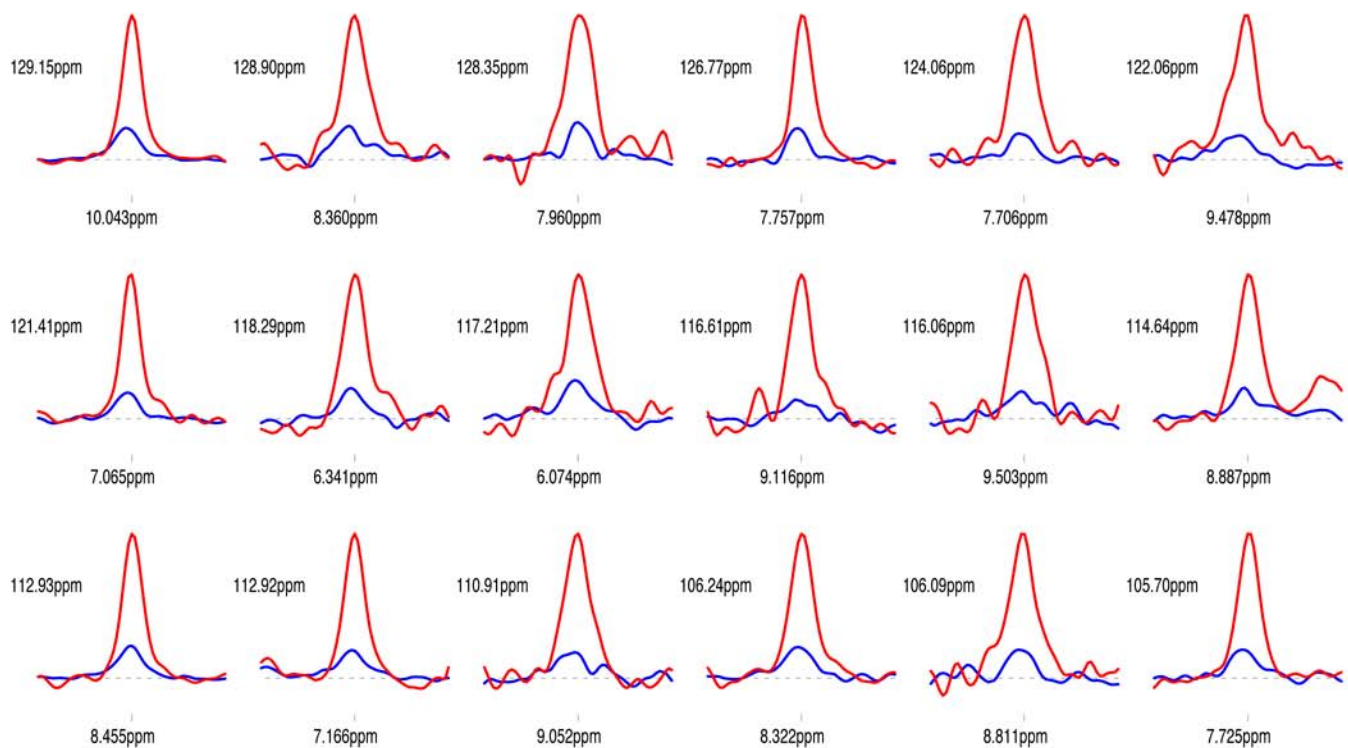

Supplement: 7601936s1.pdf [file 7601936s1.pdf]
